# Supplementary material
Source: publisher site journal article supplement (https://www.dovepress.com/get_supplementary_file.php?f=237559.docx)
Supplement: Supplementary file 1 [file get_supplementary_file.php]

**Supplementary material and methods**

**Cell cycle assay**

MDA-MB-468 and MDA-MB-231 cells were collected following treatment for 48 h, and fixed with 70% ice‐cold ethanol at−20℃for24 h. After that, the cells were washed by phosphate-buffered saline (PBS) and then hatched using PI solution (25 μg/mL) in PBS containing Triton X‐100 (0.2%) and RNase (50 μg/mL) for 30 min at 37℃. Finally, the cell cycle distribution was analyzed via flow cytometry (Guava Technologies).

Supplementary Table 1. Association between clinical features and PCAT6 expression of TNBC patients (n=70)

| Parameter | Case | PCAT6 expression | | *P* valuea |
| --- | --- | --- | --- | --- |
|  |  | High(n=36) | Low(n=34) |  |
| Age (years) |  |  |  |  |
| ≤55 | 39 | 19 | 20 | 0.7885 |
| >55 | 31 | 17 | 14 |  |
| Menopause |  |  |  |  |
| No | 47 | 25 | 22 | 0.8671 |
| Yes | 23 | 11 | 12 |  |
| Tumor size |  |  |  |  |
| ≤3 cm | 42 | 25 | 17 | 0.1569 |
| >3 cm | 28 | 11 | 17 |  |
| Lymph node metastasis |  |  |  |  |
| No | 24 | 19 | 5 | 0.0019 ** |
| Yes | 46 | 17 | 29 |  |
| Stage |  |  |  |  |
| I | 13 | 3 | 10 | 0.0350* |
| II | 23 | 11 | 12 |  |
| III | 34 | 22 | 12 |  |

Low or high was evaluated by the sample mean of PCAT6 expression. **P*<0.05, ***P*<0.01, aChi-square test.

Supplementary Table 2. Association between clinical features and miR-185-5p expression of TNBC patients (n=70)

| Parameter | Case | miR-185-5p expression | | *P* valuea |
| --- | --- | --- | --- | --- |
| High(n=33) | Low(n=37) |
| Age (years) |  |  |  |  |
| ≤55 | 39 | 25 | 14 | 0.6062 |
| >55 | 31 | 18 | 13 |  |
| Menopause |  |  |  |  |
| No | 47 | 28 | 19 | 0.1374 |
| Yes | 23 | 15 | 18 |  |
| Tumor size |  |  |  |  |
| ≤3 cm | 42 | 20 | 22 | 0.9221 |
| >3 cm | 28 | 13 | 15 |  |
| Lymph node metastasis |  |  |  |  |
| No | 24 | 16 | 9 | 0.0451* |
| Yes | 46 | 18 | 28 |  |
| Stage |  |  |  |  |
| I | 13 | 10 | 3 | 0.0005** |
| II | 23 | 15 | 8 |  |
| III | 34 | 8 | 26 |  |

Low or high was evaluated by the sample mean of miR-185-5p expression. **P*<0.05, ***P*<0.01, aChi-square test.

Supplementary Table 3. Association between clinical features and TPD52 expression of TNBC patients (n=70)

| Parameter | Case | TPD52 expression | | *P* valuea |
| --- | --- | --- | --- | --- |
| High(n=32) | Low(n=38) |
| Age (years) |  |  |  |  |
| ≤55 | 39 | 20 | 19 | 0.2942 |
| >55 | 31 | 12 | 19 |  |
| Menopause |  |  |  |  |
| No | 47 | 21 | 26 | 0.8040 |
| Yes | 23 | 11 | 12 |  |
| Tumor size |  |  |  |  |
| ≤3 cm | 42 | 23 | 19 | 0.0627 |
| >3 cm | 28 | 9 | 19 |  |
| Lymph node metastasis |  |  |  |  |
| No | 24 | 18 | 6 | 0.0010** |
| Yes | 46 | 14 | 32 |  |
| Stage |  |  |  |  |
| I | 13 | 10 | 3 | 0.0225* |
| II | 23 | 11 | 12 |  |
| III | 34 | 11 | 23 |  |

Low or high was evaluated by the sample mean of TPD52 expression. **P*<0.05, ***P*<0.01, aChi-square test.

**Supplementary Fig. 1. Knockdown of *PCAT6* inhibited cell viability and induced apoptosis of radioresistant TNBC cells.** (A and B) Cell viability was assessed by CCK-8 assay in MDA-MB-468/C4 and MDA-MB-231/C4 cells transfected with si-NC or si-*PCAT6*.(C and D) Flow cytometry analysis was utilized to determine the apoptosis rate in MDA-MB-468/C4 and MDA-MB-231/C4 cells transfected with si-*PCAT6* or si-NC and/or treated with 4Gy irradiation. **P*<0.05.


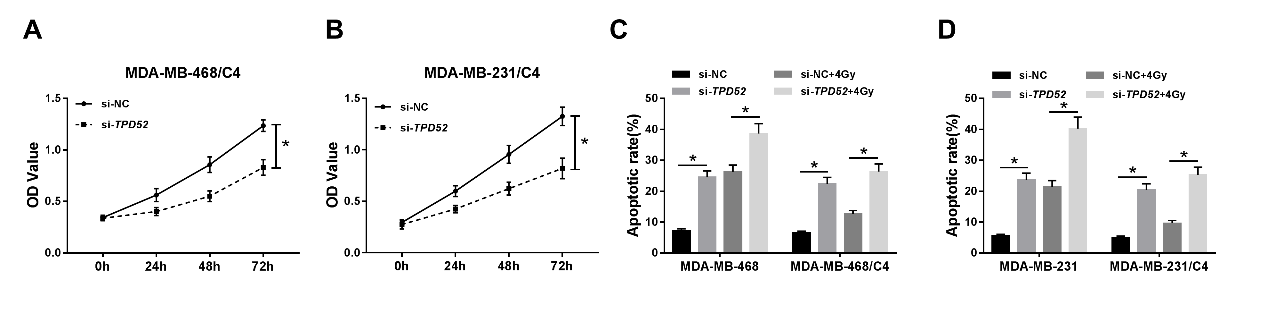


**Supplementary Fig. 2. Knockdown of *PCAT6* arrestedTNBC cell cycle in the G0/G1 phase.** (A and B) Flow cytometry was utilized to examine the cell cycle distribution in MDA-MB-468 and MDA-MB-231 cells transfected with si-*PCAT6* or si-NC and/or treated with 4Gy irradiation. **P*<0.05.


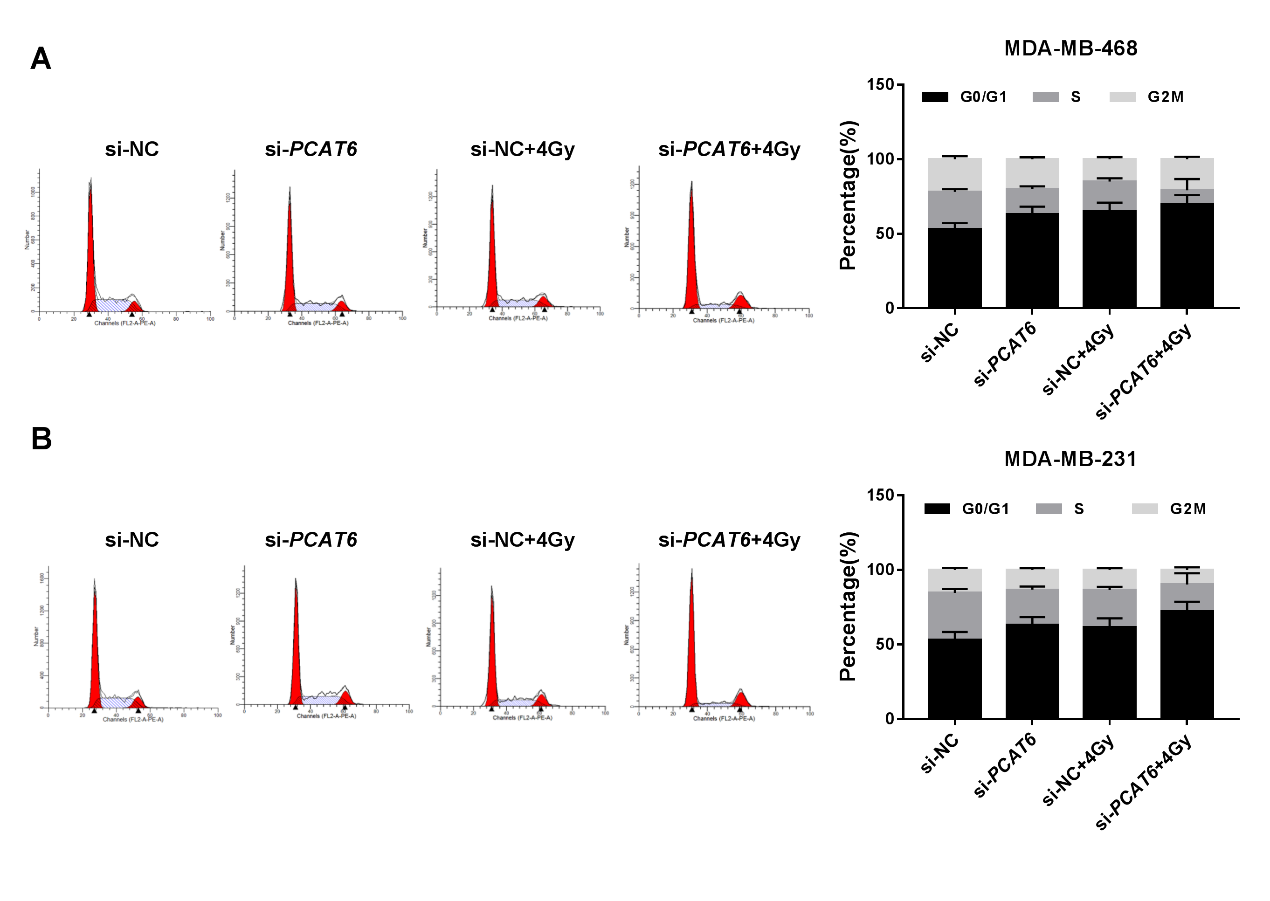


**Supplementary Fig. 3. *PCAT6* served as a molecular sponge of *miR-185-5p* to modulate *TPD52* expression in radioresistant TNBC cells.** MDA-MB-468/C4 and MDA-MB-231/C4 cells were transfected with si-NC, si-*PCAT6*, si-*PCAT6* + anti-NC, or si-*PCAT6* + anti-*miR-185-5p*. (A and B)The mRNA expression of *TPD52* was evaluated using qRT-PCR analysis. (C and D) The protein expression of TPD52 was measured by western blot analysis. (E and F) CCK-8 assay was used to analyze the cell viability. **P*<0.05.

**
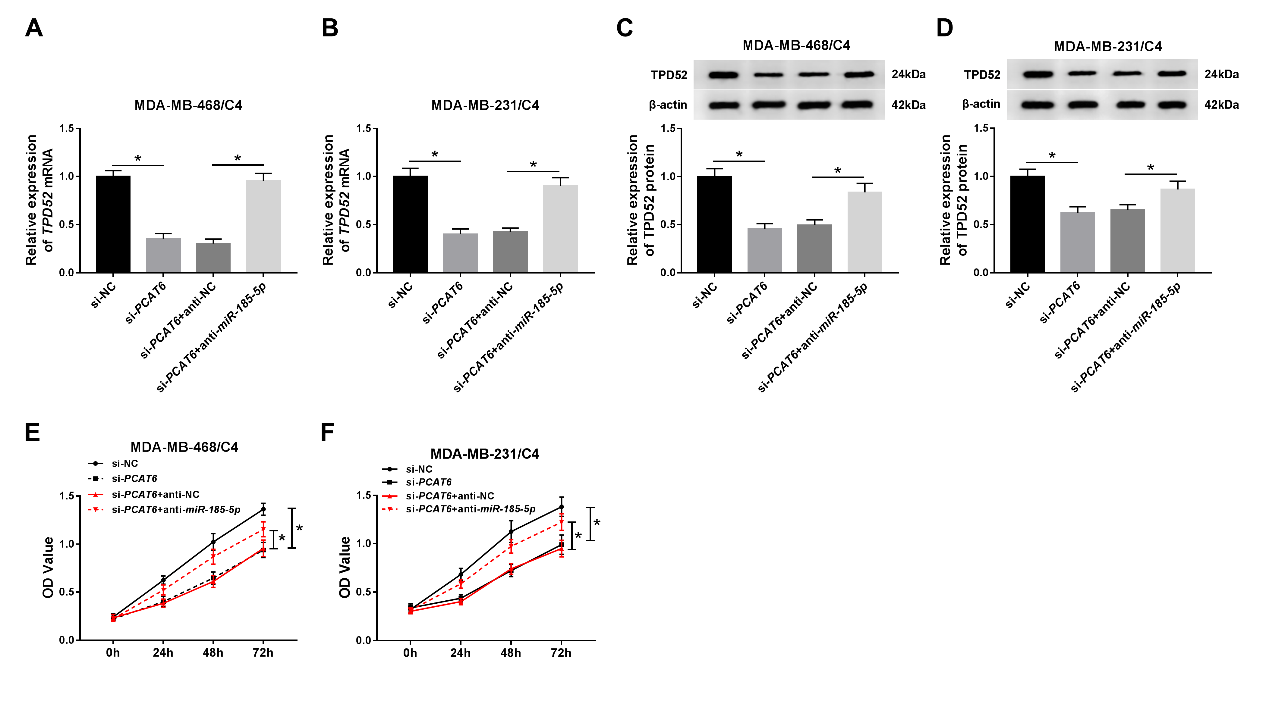
**
